# Supplementary material for: Effect of the Type of Heterostructures on Photostimulated Alteration of the Surface Hydrophilicity: TiO2/BiVO4 vs. ZnO/BiVO4 Planar Heterostructured Coatings
Source: MDPI journal article supplement (doi:10.3390/catal11121424), 2021-11-23
Supplement: s1 [file s1]

## Effect of the Type of Heterostructures on Photostimulated Alteration of the Surface Hydrophilicity: $\text{TiO}_2/\text{BiVO}_4$ vs. $\text{ZnO}/\text{BiVO}_4$ Planar Heterostructured Coatings

M.V. Maevskaya,<sup>1</sup> A.V. Rudakova,<sup>1</sup> A.V. Koroleva,<sup>2</sup> A.S. Sakhatskii,<sup>3</sup> A.V. Emeline,<sup>1</sup> D.W. Bahnemann<sup>1, 4, \*</sup>

<sup>1</sup> Laboratory "Photoactive Nanocomposite Materials", Saint-Petersburg State University, Ulianovskaya str. 1, Peterhof, Saint-Petersburg, 198504, Russia

<sup>2</sup> Centre for Physical Methods of Surface Investigation, Research Park, Saint-Petersburg State University, Ulianovskaya str. 1, Peterhof, Saint-Petersburg, 198504, Russia

<sup>3</sup> Centre for Diagnostics of Functional Materials for Medicine, Pharmacology and Nanoelectronics, Research Park, Saint-Petersburg State University, Ulianovskaya str. 1, Peterhof, Saint-Petersburg, 198504, Russia

<sup>4</sup> Institut fuer Technische Chemie, Gottfried Wilhelm Leibniz Universitaet Hannover, Callinstrasse 3, D-30167 Hannover, Germany

\* Corresponding author: bahnemann@iftc.uni-hannover.de

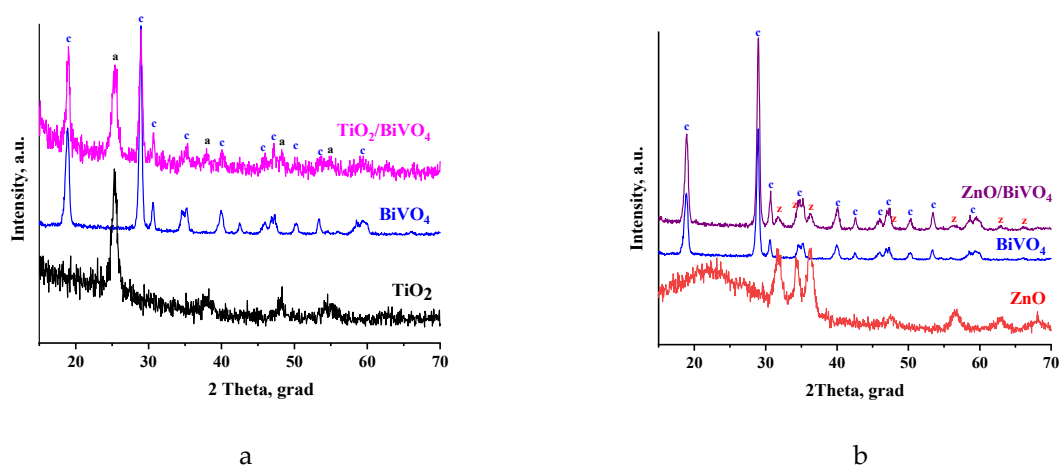

**Figure S1.** XRD patterns of synthesized coatings: (a)  $\text{TiO}_2$ ,  $\text{BiVO}_4$  and  $\text{TiO}_2/\text{BiVO}_4$ , (b)  $\text{ZnO}$ ,  $\text{BiVO}_4$ ,  $\text{ZnO}/\text{BiVO}_4$ . The letters "a", "z" and "c" denote the phases of anatase, zincite and monoclinic clinobisvanite, respectively.

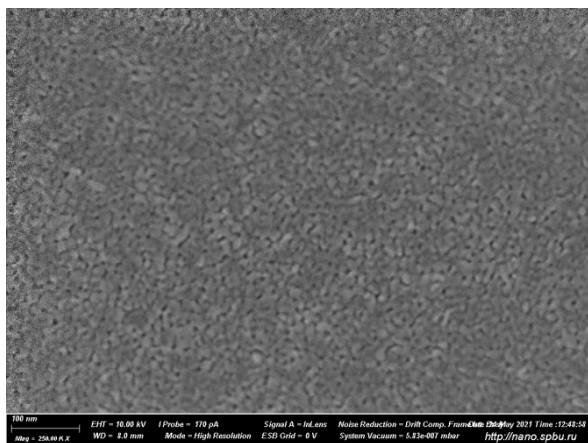

a

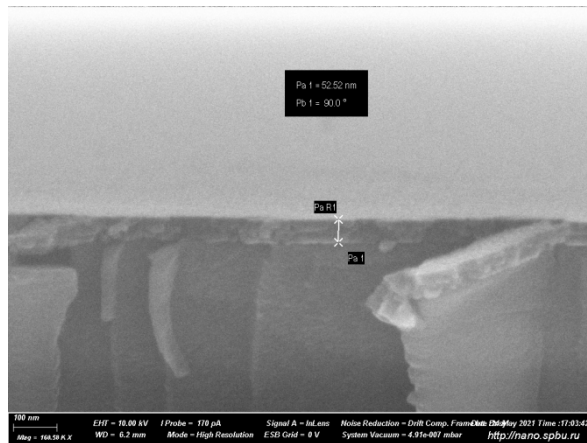

b

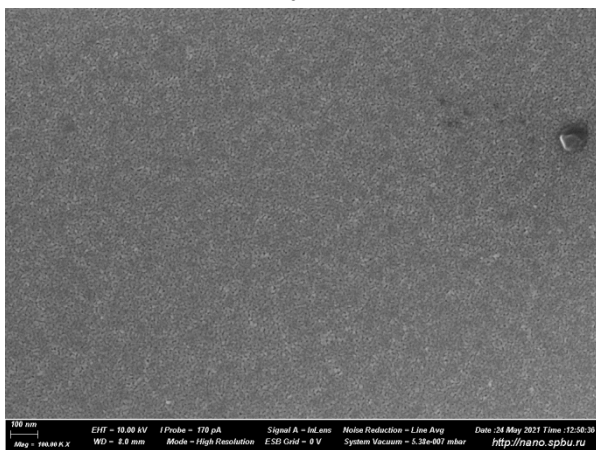

c

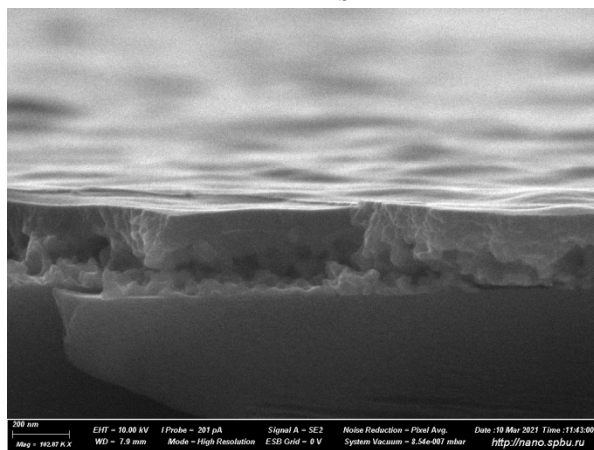

d

**Figure S2.** SEM images of TiO<sub>2</sub>-topped surfaces (**a**, **c**) and cross-sections (**b**, **d**) for TiO<sub>2</sub> (**a**, **b**) and TiO<sub>2</sub>/BiVO<sub>4</sub> (**b**, **d**) coatings.

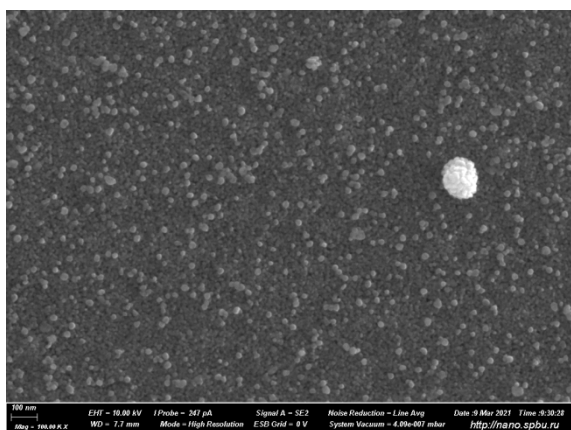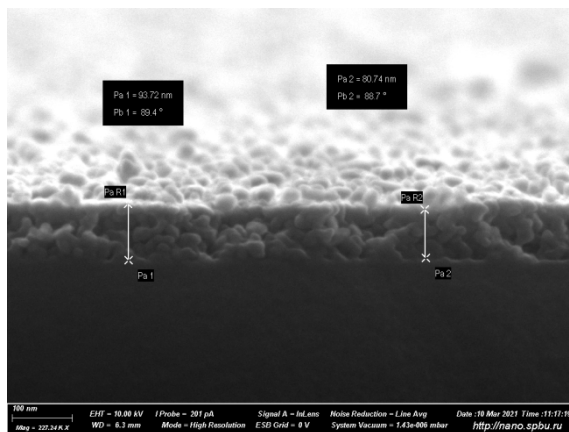

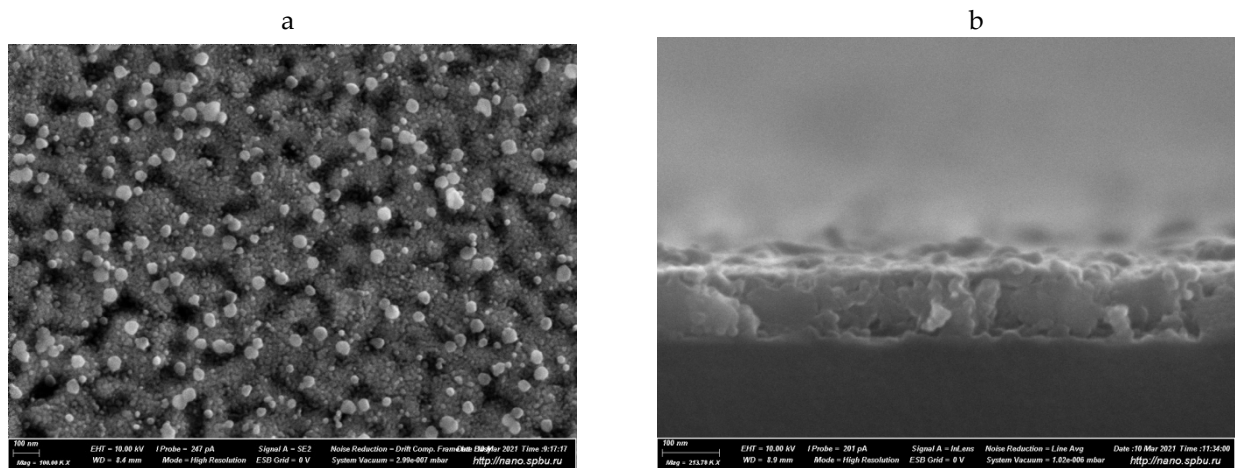

**Figure S3.** SEM images of ZnO surfaces (**a**, **c**) and cross-sections (**b**, **d**) for ZnO (**a**, **b**) and ZnO/BiVO<sub>4</sub> (**b**, **d**) coatings.

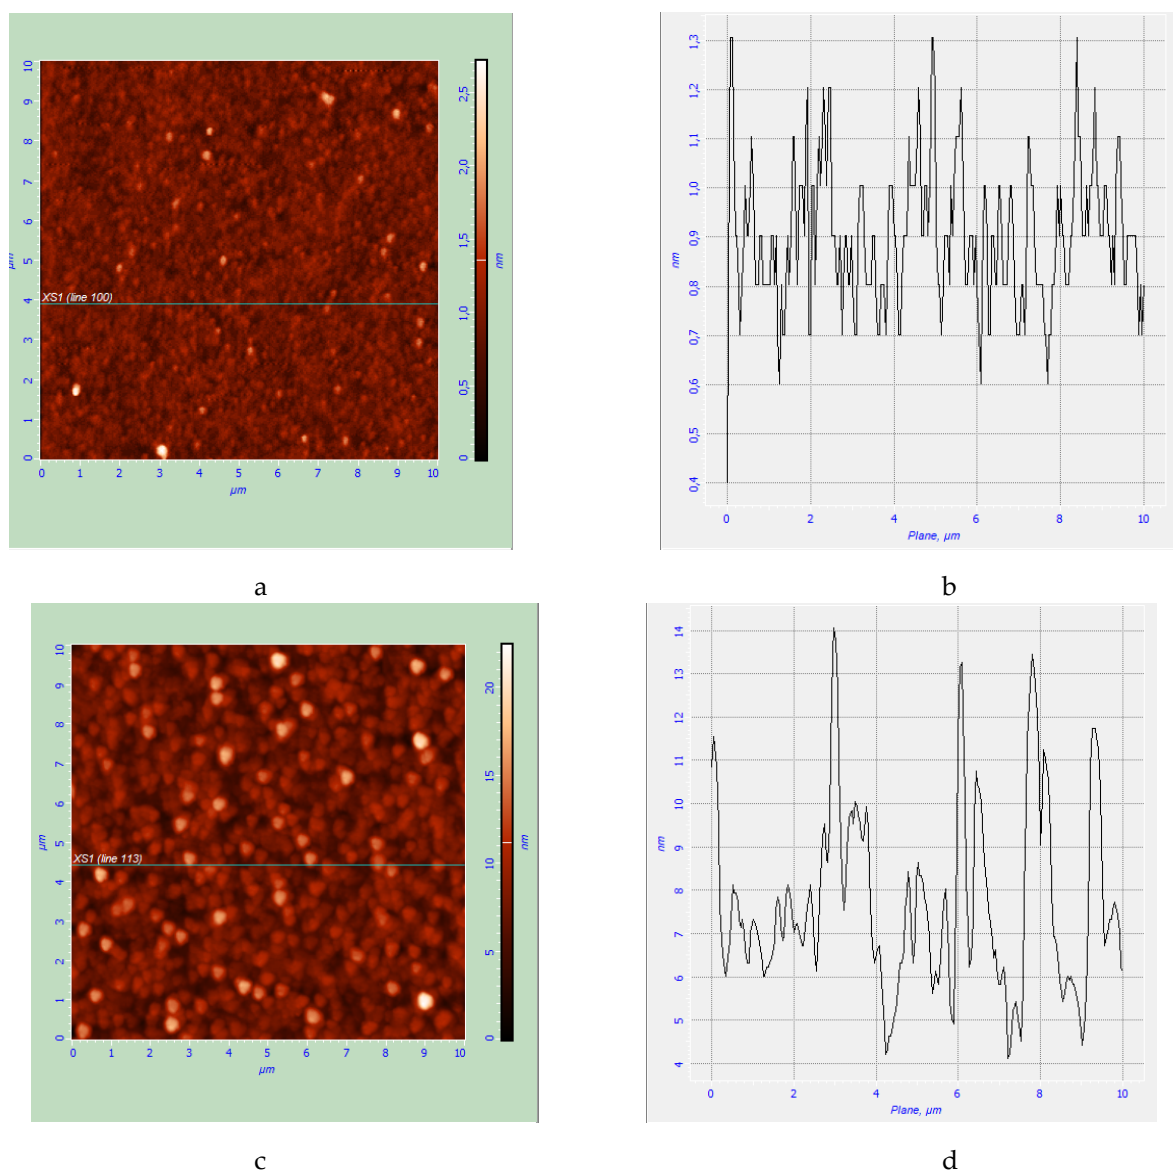

**Figure S4.** AFM image of the TiO<sub>2</sub> surfaces (**a**, **c**) and roughness profiles (**b**, **d**) for TiO<sub>2</sub> (**a**, **b**) and TiO<sub>2</sub>/BiVO<sub>4</sub> (**b**, **d**) coatings.

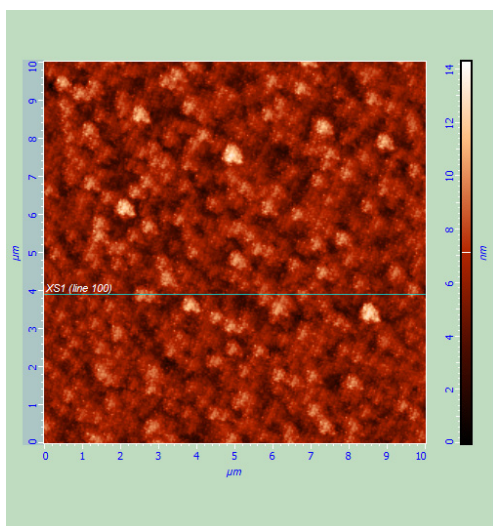

a

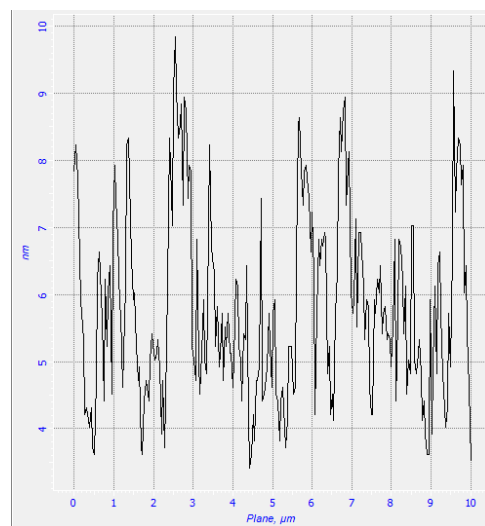

b

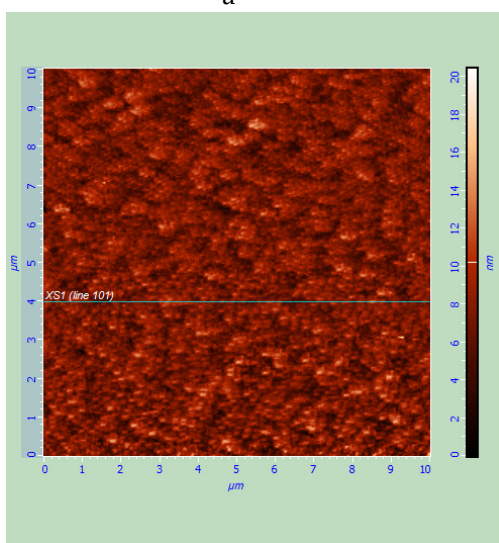

c

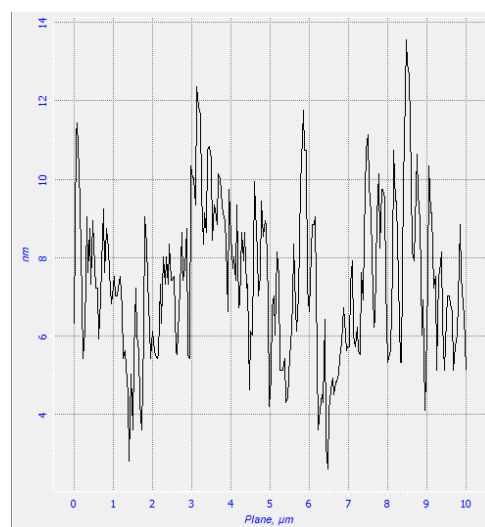

d

**Figure S5.** AFM image of the ZnO surfaces (a, c) and roughness profiles (b, d) for ZnO (a, b) and ZnO/BiVO<sub>4</sub> (b, d) coatings.

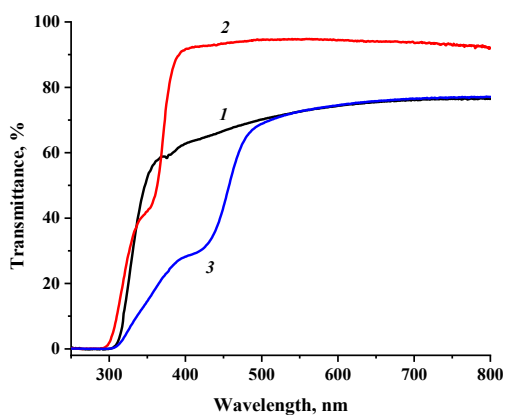

a

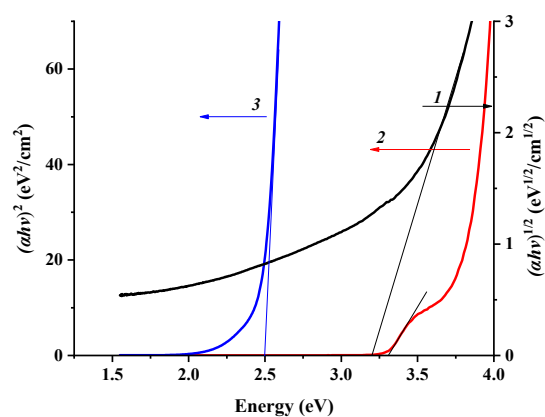

b

**Figure S6.** Transmittance spectra (a) and Tauc plots (b) for coatings' components: 1 – TiO<sub>2</sub>, 2 – ZnO, 3 – BiVO<sub>4</sub>.

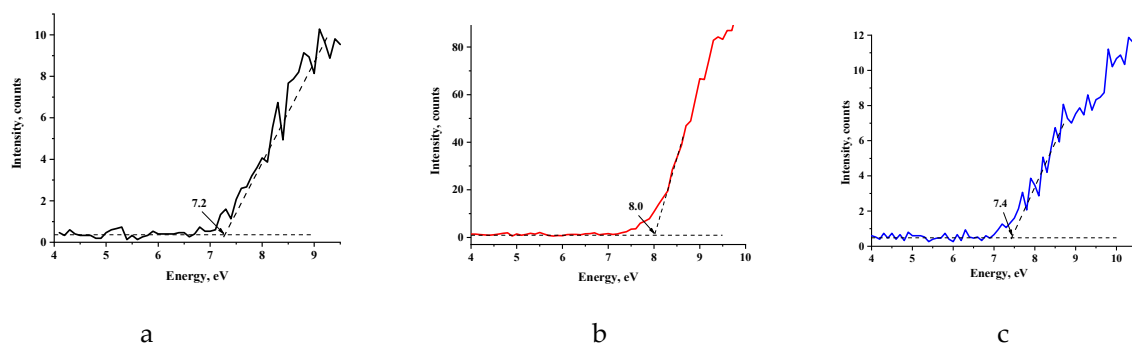

**Figure S7.** Calibrated XPS spectra of valence band region for coatings' components: **a** –  $\text{TiO}_2$ , **b** –  $\text{ZnO}$ , **c** –  $\text{BiVO}_4$ .

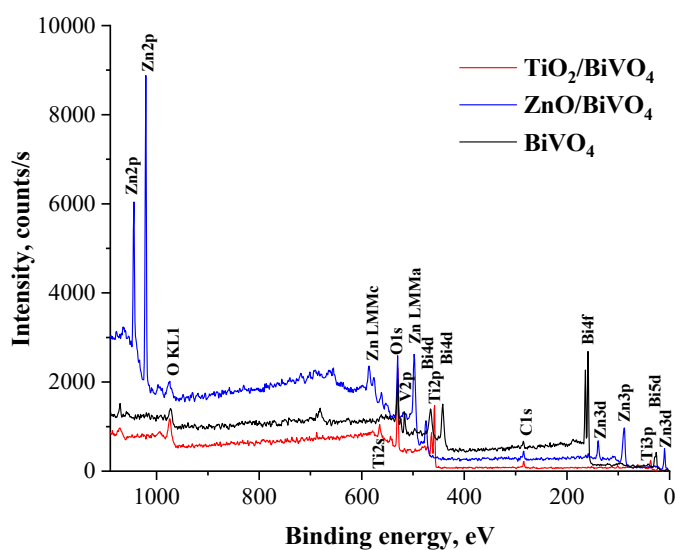

**Figure S8.** Survey XPS spectra of  $\text{TiO}_2/\text{BiVO}_4$ ,  $\text{ZnO}/\text{BiVO}_4$  and  $\text{BiVO}_4$ .

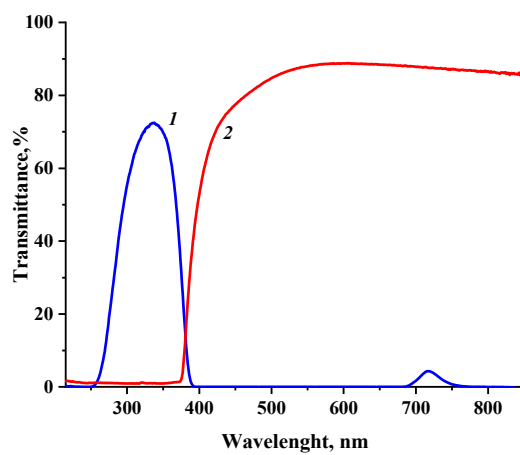

**Figure S9.** Transmittance spectra of UV band-pass (1) and Vis cut-off (2) filters (LOMO, Russia).
